# Supplementary material for: High-resolution small RNA structures from exact nuclear Overhauser enhancement measurements without additional restraints
Source: Commun Biol. 2018 Jun 7;1:61. doi: 10.1038/s42003-018-0067-x (PMC6123705; doi:10.1038/s42003-018-0067-x)
Supplement: Supplementary file 3 — Supplementary Data 1 [file 42003_2018_67_MOESM3_ESM.xlsx]

## Sheet: Table 1. eNOE List
Atom 1	Atom 2	Bi- or uni-directional	reff (Å)
2 RGUA H1	12 RGUA H1	bi-dir	3.74
11 URA H3	12 RGUA H1	bi-dir	4.85
4 RADE H2	11 URA H3	bi-dir	2.78
4 RADE H2	12 RGUA H1	bi-dir	4.34
11 URA H1'	11 URA H3	bi-dir	4.6
11 URA H3	11 URA H5	bi-dir	4.06
6 URA H6	10 RGUA H1	bi-dir	5.01
4 RADE H2	10 RGUA H1	bi-dir	4.73
5 RCYT H5	10 RGUA H1	bi-dir	4.84
5 RCYT H6	10 RGUA H1	bi-dir	5.54
6 URA HO2'	9 RGUA H1	bi-dir	3.13
6 URA H2'	9 RGUA H1	bi-dir	3.55
6 URA H2'	6 URA HO2'	bi-dir	2.39
6 URA HO2'	7 URA H6	bi-dir	3.49
5 RCYT H1'	10 RGUA H1	bi-dir	5.11
2 RGUA H1	13 RCYT H5	bi-dir	4.78
2 RGUA H1	14 RCYT H1'	bi-dir	4.82
5 RCYT H41	10 RGUA H1	bi-dir	2.64
5 RCYT H42	10 RGUA H1	bi-dir	4.19
3 RCYT H41	3 RCYT H5	bi-dir	3.57
13 RCYT H41	13 RCYT H5	bi-dir	3.77
5 RCYT H41	5 RCYT H5	bi-dir	3.95
3 RCYT H41	12 RGUA H1	bi-dir	2.59
2 RGUA H1	13 RCYT H41	bi-dir	2.6
2 RGUA H1	13 RCYT H42	bi-dir	3.98
3 RCYT H42	12 RGUA H1	bi-dir	4.09
5 RCYT H41	11 URA H3	bi-dir	4.48
5 RCYT H42	11 URA H3	bi-dir	5.11
3 RCYT H42	11 URA H3	bi-dir	5.28
6 URA H2'	8 RCYT H41	bi-dir	3.73
5 RCYT H42	5 RCYT H5	bi-dir	2.62
13 RCYT H42	13 RCYT H5	bi-dir	2.62
3 RCYT H42	3 RCYT H5	bi-dir	2.51
2 RGUA H1	14 RCYT H41	bi-dir	3.79
2 RGUA H1	3 RCYT H41	bi-dir	3.26
14 RCYT H41	14 RCYT H42	bi-dir	1.63
5 RCYT H41	5 RCYT H42	bi-dir	1.8
13 RCYT H41	13 RCYT H42	bi-dir	1.71
3 RCYT H41	3 RCYT H42	bi-dir	1.69
8 RCYT H41	8 RCYT H42	bi-dir	1.67
10 RGUA H21	10 RGUA H22	bi-dir	1.65
6 URA H2'	7 URA H6	bi-dir	4.56
6 URA H2'	6 URA H6	bi-dir	3.83
5 RCYT H1'	5 RCYT H6	bi-dir	3.79
5 RCYT H5	5 RCYT H6	bi-dir	2.59
8 RCYT H4'	9 RGUA H8	bi-dir	5.48
9 RGUA H2'	9 RGUA H8	bi-dir	4.76
10 RGUA H8	11 URA H5	bi-dir	5.06
11 URA H5	11 URA H6	bi-dir	2.67
10 RGUA H8	11 URA H6	bi-dir	4.65
6 URA H2'	7 URA H6	bi-dir	4.56
5 RCYT H6	6 URA H6	bi-dir	4.27
1 RGUA H2'	2 RGUA H8	bi-dir	2.56
1 RGUA H2'	1 RGUA H1'	bi-dir	2.9
11 URA H1'	11 URA H6	bi-dir	3.74
4 RADE H2	5 RCYT H1'	bi-dir	3.52
6 URA H2'	6 URA H6	bi-dir	3.83
2 RGUA H1'	2 RGUA H8	bi-dir	3.93
1 RGUA H1'	2 RGUA H8	bi-dir	5.12
1 RGUA H2'	2 RGUA H1'	bi-dir	4.13
5 RCYT H1'	6 URA H6	bi-dir	4.79
12 RGUA H8	13 RCYT H5	bi-dir	4.12
2 RGUA H8	3 RCYT H5	bi-dir	4.03
4 RADE H2	11 URA H1'	bi-dir	5.03
11 URA H1'	12 RGUA H8	bi-dir	4.66
8 RCYT H5"	8 RCYT H4'	bi-dir	2.62
8 RCYT H5'	8 RCYT H4'	bi-dir	2.39
8 RCYT H5"	9 RGUA H8	bi-dir	5.17
8 RCYT H5'	9 RGUA H8	bi-dir	4.86
1 RGUA H5"	1 RGUA H2'	bi-dir	5.04
1 RGUA H5"	1 RGUA H1'	bi-dir	5.19
1 RGUA H5"	2 RGUA H8	bi-dir	6.3
8 RCYT H5'	8 RCYT H5"	bi-dir	1.89
2 RGUA H1	13 RCYT H6	uni-dir	4.82
3 RCYT H5	12 RGUA H1	uni-dir	4.66
6 URA H6	9 RGUA H1	uni-dir	5.53
6 URA HO2'	8 RCYT H5	uni-dir	3.93
6 URA HO2'	6 URA H1'	uni-dir	2.24
9 RGUA H1	10 RGUA H1	uni-dir	4.96
9 RGUA H1	10 RGUA H1'	uni-dir	4.39
9 RGUA H1	10 RGUA H8	uni-dir	5.08
11 URA H3	11 URA H6	uni-dir	4.21
3 RCYT H1'	12 RGUA H1	uni-dir	4.61
8 RCYT H1'	9 RGUA H1	uni-dir	4.15
8 RCYT H5	9 RGUA H1	uni-dir	5.26
8 RCYT H6	9 RGUA H1	uni-dir	4.38
2 RGUA H1	14 RCYT H42	uni-dir	4.67
3 RCYT H41	11 URA H3	uni-dir	5.15
5 RCYT H41	5 RCYT H6	uni-dir	5.63
6 URA H6	8 RCYT H41	uni-dir	3.42
6 URA HO2'	7 URA H5"	uni-dir	3.75
8 RCYT H42	8 RCYT H5	uni-dir	2.28
8 RCYT H5"	9 RGUA H1	uni-dir	5.63
12 RGUA H1	13 RCYT H41	uni-dir	4.27
12 RGUA H1	13 RCYT H42	uni-dir	4.95
14 RCYT H42	14 RCYT H5	uni-dir	2.25
3 RCYT H41	3 RCYT H6	uni-dir	4.69
7 URA H5"	9 RGUA H1	uni-dir	4.96
2 RGUA H1'	3 RCYT H6	uni-dir	5.01
1 RGUA H1'	1 RGUA H8	uni-dir	3.72
1 RGUA H2'	1 RGUA H8	uni-dir	3.59
1 RGUA H4'	2 RGUA H8	uni-dir	6.01
2 RGUA H1'	3 RCYT H6	uni-dir	5.01
2 RGUA H4'	2 RGUA H8	uni-dir	3.9
4 RADE H1'	5 RCYT H6	uni-dir	5.32
4 RADE H2	12 RGUA H1'	uni-dir	3.79
4 RADE H2	5 RCYT H3'	uni-dir	6.18
4 RADE H2'	5 RCYT H6	uni-dir	2.49
4 RADE H8	5 RCYT H5	uni-dir	4.31
5 RCYT H2'	5 RCYT H1'	uni-dir	2.9
5 RCYT H2'	5 RCYT H6	uni-dir	4.04
5 RCYT H2'	6 URA H6	uni-dir	2.52
5 RCYT H3'	5 RCYT H6	uni-dir	2.8
6 URA H2'	8 RCYT H5	uni-dir	2.72
6 URA H2'	7 URA H5	uni-dir	5.07
6 URA H2'	7 URA H2'	uni-dir	3.8
6 URA H3'	6 URA H2'	uni-dir	2.51
6 URA H5	6 URA H6	uni-dir	2.47
7 URA H2'	7 URA H6	uni-dir	2.55
7 URA H4'	7 URA H6	uni-dir	4.68
7 URA H5	7 URA H6	uni-dir	2.62
8 RCYT H4'	8 RCYT H1'	uni-dir	3.33
8 RCYT H4'	9 RGUA H3'	uni-dir	3.77
8 RCYT H4'	8 RCYT H6	uni-dir	3.93
9 RGUA H1'	9 RGUA H8	uni-dir	2.43
9 RGUA H2'	10 RGUA H4'	uni-dir	2.97
9 RGUA H2'	9 RGUA H1'	uni-dir	2.67
9 RGUA H3'	10 RGUA H8	uni-dir	3.64
10 RGUA H1'	10 RGUA H8	uni-dir	3.69
10 RGUA H2'	11 URA H6	uni-dir	2.39
10 RGUA H3'	11 URA H6	uni-dir	3.47
11 URA H3'	12 RGUA H8	uni-dir	2.94
11 URA H3'	11 URA H1'	uni-dir	4.15
11 URA H4'	11 URA H1'	uni-dir	3.25
12 RGUA H3'	13 RCYT H5	uni-dir	4.23
13 RCYT H2'	13 RCYT H1'	uni-dir	2.88
13 RCYT H3'	13 RCYT H1'	uni-dir	4.35
13 RCYT H5	13 RCYT H6	uni-dir	2.58
14 RCYT H1'	14 RCYT H6	uni-dir	3.91
14 RCYT H3'	14 RCYT H1'	uni-dir	4.06
1 RGUA H2'	2 RGUA H4'	uni-dir	3.99
1 RGUA H5'	2 RGUA H8	uni-dir	6.97
1 RGUA H5"	1 RGUA H4'	uni-dir	2.65
1 RGUA H5"	1 RGUA H3'	uni-dir	2.94
5 RCYT H5'	5 RCYT H6	uni-dir	4.4
5 RCYT H5"	5 RCYT H6	uni-dir	3.57
7 URA H2'	8 RCYT H5"	uni-dir	5.13
7 URA H5'	7 URA H6	uni-dir	4.17
7 URA H5"	7 URA H6	uni-dir	4.39
8 RCYT H4'	9 RGUA H5"	uni-dir	3.17
8 RCYT H5'	8 RCYT H6	uni-dir	3.71
8 RCYT H5"	8 RCYT H1'	uni-dir	4.55
8 RCYT H5"	8 RCYT H3'	uni-dir	2.98
8 RCYT H5"	8 RCYT H2'	uni-dir	3.99
8 RCYT H5"	9 RGUA H5"	uni-dir	5.26
10 RGUA H5"	10 RGUA H8	uni-dir	2.95
11 URA H5'	11 URA H6	uni-dir	3.92
12 RGUA H5"	12 RGUA H8	uni-dir	3.56
13 RCYT H5'	13 RCYT H1'	uni-dir	4.45
1 RGUA H5'	1 RGUA H5"	uni-dir	1.71
2 RGUA H1	14 RCYT H5	uni-dir	4.29
2 RGUA H1	13 RCYT H1'	uni-dir	4.82
6 URA H1'	9 RGUA H1	uni-dir	3.43
6 URA H1'	10 RGUA H1	uni-dir	3.74
11 URA H3	12 RGUA H1'	uni-dir	4.97
12 RGUA H1	13 RCYT H1'	uni-dir	4.59
6 URA HO2'	7 URA H2'	uni-dir	3.33
7 URA H2'	9 RGUA H1	uni-dir	4.41
11 URA H2'	11 URA H3	uni-dir	4.57
1 RGUA H3'	1 RGUA H2'	uni-dir	2.46
1 RGUA H3'	2 RGUA H8	uni-dir	3.18
1 RGUA H3'	1 RGUA H1'	uni-dir	3.93
1 RGUA H4'	1 RGUA H2'	uni-dir	3.45
1 RGUA H4'	1 RGUA H1'	uni-dir	3.37
2 RGUA H2'	2 RGUA H1'	uni-dir	2.72
2 RGUA H2'	3 RCYT H5	uni-dir	3.67
2 RGUA H2'	2 RGUA H8	uni-dir	3.4
2 RGUA H3'	3 RCYT H5	uni-dir	3.78
2 RGUA H3'	2 RGUA H8	uni-dir	3.2
2 RGUA H3'	2 RGUA H1'	uni-dir	4.16
2 RGUA H4'	2 RGUA H1'	uni-dir	3.06
3 RCYT H5	3 RCYT H6	uni-dir	2.44
4 RADE H1'	4 RADE H2	uni-dir	4.36
4 RADE H2'	5 RCYT H5	uni-dir	4.03
4 RADE H2'	5 RCYT H1'	uni-dir	3.66
4 RADE H2'	4 RADE H2	uni-dir	4.74
4 RADE H3'	5 RCYT H6	uni-dir	2.83
4 RADE H8	5 RCYT H6	uni-dir	4.94
5 RCYT H3'	5 RCYT H1'	uni-dir	3.65
5 RCYT H3'	6 URA H6	uni-dir	2.94
5 RCYT H3'	5 RCYT H5	uni-dir	4.21
5 RCYT H4'	5 RCYT H1'	uni-dir	2.91
5 RCYT H4'	5 RCYT H6	uni-dir	3.54
5 RCYT H5	6 URA H5	uni-dir	3.79
5 RCYT H6	6 URA H5	uni-dir	4.19
6 URA H1'	7 URA H6	uni-dir	5.19
6 URA H2'	6 URA H1'	uni-dir	2.93
6 URA H2'	8 RCYT H6	uni-dir	3.8
6 URA H3'	6 URA H6	uni-dir	2.61
7 URA H1'	7 URA H6	uni-dir	3.75
7 URA H3'	7 URA H6	uni-dir	4.31
8 RCYT H4'	8 RCYT H3'	uni-dir	2.81
8 RCYT H4'	8 RCYT H2'	uni-dir	3.71
9 RGUA H2'	10 RGUA H8	uni-dir	3.97
9 RGUA H3'	9 RGUA H2'	uni-dir	2.34
9 RGUA H3'	9 RGUA H8	uni-dir	5.08
9 RGUA H4'	9 RGUA H8	uni-dir	5.58
10 RGUA H2'	11 URA H5	uni-dir	3.74
10 RGUA H3'	10 RGUA H8	uni-dir	2.81
10 RGUA H3'	11 URA H5	uni-dir	3.28
10 RGUA H4'	10 RGUA H8	uni-dir	3.54
11 URA H2'	12 RGUA H8	uni-dir	2.65
11 URA H2'	11 URA H1'	uni-dir	2.95
11 URA H2'	11 URA H6	uni-dir	4.14
11 URA H3'	11 URA H6	uni-dir	2.8
11 URA H3'	11 URA H5	uni-dir	4.12
12 RGUA H1'	12 RGUA H8	uni-dir	3.78
12 RGUA H2'	13 RCYT H5	uni-dir	3.84
12 RGUA H2'	13 RCYT H1'	uni-dir	3.7
12 RGUA H3'	12 RGUA H8	uni-dir	2.68
13 RCYT H1'	13 RCYT H6	uni-dir	3.57
13 RCYT H2'	14 RCYT H1'	uni-dir	4.18
13 RCYT H2'	13 RCYT H5	uni-dir	4.53
13 RCYT H3'	13 RCYT H5	uni-dir	4.17
14 RCYT H2'	14 RCYT H1'	uni-dir	2.86
5 RCYT H2'	5 RCYT H5	uni-dir	4.42
5 RCYT H4'	5 RCYT H5	uni-dir	4.67
13 RCYT H5	14 RCYT H5	uni-dir	3.48
10 RGUA H1	11 URA H1'	uni-dir	4.6
2 RGUA H1	3 RCYT H42	uni-dir	4.13
3 RCYT H42	3 RCYT H6	uni-dir	4.49
4 RADE H61	11 URA H3	uni-dir	3.64
7 URA H5"	8 RCYT H41	uni-dir	5.82
8 RCYT H41	8 RCYT H5	uni-dir	3.2
8 RCYT H41	8 RCYT H6	uni-dir	4.4
12 RGUA H22	12 RGUA H1	uni-dir	3.62
14 RCYT H41	14 RCYT H5	uni-dir	3.59
14 RCYT H42	14 RCYT H6	uni-dir	4.37
4 RADE H62	11 URA H3	uni-dir	4.73
6 URA H1'	10 RGUA H21	uni-dir	2.51
6 URA H3'	8 RCYT H41	uni-dir	3.61
1 RGUA H2'	2 RGUA H5"	uni-dir	4.5
1 RGUA H5'	1 RGUA H1'	uni-dir	4.15
1 RGUA H5"	1 RGUA H8	uni-dir	3.68
2 RGUA H5"	2 RGUA H1'	uni-dir	5.14
2 RGUA H5"	2 RGUA H8	uni-dir	3.87
8 RCYT H4'	9 RGUA H5'	uni-dir	3.21
8 RCYT H5'	8 RCYT H3'	uni-dir	3.69
8 RCYT H5'	8 RCYT H1'	uni-dir	5.13
8 RCYT H5'	8 RCYT H2'	uni-dir	4.54
8 RCYT H5'	8 RCYT H5	uni-dir	6.05
8 RCYT H5"	8 RCYT H5	uni-dir	5.96
8 RCYT H5"	8 RCYT H6	uni-dir	3.96
8 RCYT H5"	9 RGUA H5'	uni-dir	5.16
11 URA H5"	11 URA H6	uni-dir	3.72
14 RCYT H5'	14 RCYT H1'	uni-dir	4.96
1 RGUA H5'	1 RGUA H2'	uni-dir	4.4
5 RCYT H5"	5 RCYT H5	uni-dir	4.78
5 RCYT H5"	5 RCYT H1'	uni-dir	4.49
11 URA H5"	11 URA H1'	uni-dir	4.88
12 RGUA H5"	13 RCYT H5	uni-dir	4.82
13 RCYT H5"	13 RCYT H5	uni-dir	4.89
13 RCYT H5"	13 RCYT H1'	uni-dir	4.71

## Sheet: Table 2. gn-eNOE List
Atom 1	Atom 2	Upper Limit Distance (Å)
10 RGUA H21	11 URA H1'	4.884
1 RGUA H3'	1 RGUA H8	3.476
1 RGUA H4'	1 RGUA H8	4.928
1 RGUA H5'	1 RGUA H8	4.158
1 RGUA H5'	1 RGUA H3'	4.092
2 RGUA H2'	3 RCYT H6	2.761
2 RGUA H5"	2 RGUA H4'	2.365
2 RGUA H5"	2 RGUA H3'	3.586
3 RCYT H1'	3 RCYT H6	4.07
3 RCYT H1'	4 RADE H8	5.863
3 RCYT H2'	3 RCYT H1'	3.245
3 RCYT H2'	4 RADE H8	2.816
3 RCYT H2'	3 RCYT H6	2.871
3 RCYT H3'	3 RCYT H6	3.025
3 RCYT H4'	3 RCYT H1'	3.894
3 RCYT H4'	4 RADE H8	6.402
3 RCYT H6	4 RADE H8	4.73
4 RADE H1'	4 RADE H8	4.543
4 RADE H2'	4 RADE H1'	3.377
4 RADE H2'	4 RADE H8	3.619
4 RADE H3'	4 RADE H1'	4.312
4 RADE H3'	4 RADE H8	3.454
4 RADE H4'	4 RADE H8	4.059
4 RADE H4'	4 RADE H1'	4.092
4 RADE H5'	4 RADE H8	3.729
4 RADE H5'	4 RADE H5"	2.376
4 RADE H5"	4 RADE H8	4.015
5 RCYT H3'	5 RCYT H2'	2.684
5 RCYT H3'	6 URA H5	4.114
5 RCYT H4'	5 RCYT H3'	2.706
5 RCYT H5'	5 RCYT H5"	2.09
5 RCYT H5"	5 RCYT H5	5.412
6 URA H3'	8 RCYT H5	4.785
6 URA H3'	6 URA H5	4.477
6 URA H4'	7 URA H5	3.773
6 URA H4'	6 URA H1'	3.531
6 URA H5"	6 URA H1'	5.247
6 URA H5"	7 URA H5	5.291
7 URA H2'	7 URA H1'	3.718
7 URA H2'	7 URA H5	5.39
7 URA H2'	8 RCYT H6	4.532
7 URA H4'	7 URA H1'	3.784
7 URA H4'	8 RCYT H6	4.224
7 URA H4'	7 URA H3'	2.486
7 URA H5'	8 RCYT H5	4.939
7 URA H5'	8 RCYT H6	5.962
7 URA H5'	7 URA H5"	2.123
7 URA H5"	8 RCYT H5	2.904
7 URA H5"	8 RCYT H6	2.86
7 URA H5"	7 URA H4'	2.101
7 URA H5"	7 URA H2'	3.443
8 RCYT H1'	8 RCYT H6	4.125
8 RCYT H2'	8 RCYT H1'	3.608
8 RCYT H2'	8 RCYT H5	4.741
8 RCYT H2'	8 RCYT H6	2.717
8 RCYT H3'	8 RCYT H1'	4.565
8 RCYT H5	8 RCYT H6	2.893
9 RGUA H3'	9 RGUA H1'	3.762
9 RGUA H3'	10 RGUA H3'	5.621
9 RGUA H4'	9 RGUA H1'	3.641
9 RGUA H4'	9 RGUA H3'	2.849
9 RGUA H5'	9 RGUA H5"	2.057
9 RGUA H5"	9 RGUA H3'	3.333
9 RGUA H5"	9 RGUA H1'	4.829
10 RGUA H5"	10 RGUA H3'	2.343
11 URA H5'	11 URA H5"	2.156
11 URA H5"	11 URA H4'	2.442
12 RGUA H1'	13 RCYT H6	5.709
12 RGUA H2'	12 RGUA H1'	3.179
12 RGUA H2'	13 RCYT H6	2.761
12 RGUA H3'	13 RCYT H6	4.004
12 RGUA H3'	12 RGUA H1'	4.675
12 RGUA H5'	12 RGUA H5"	2.299
12 RGUA H5'	12 RGUA H1'	4.917
12 RGUA H5"	12 RGUA H1'	5.566
13 RCYT H2'	14 RCYT H6	2.717
13 RCYT H2'	14 RCYT H5	4.015
13 RCYT H2'	13 RCYT H5	5.335
13 RCYT H3'	13 RCYT H6	2.981
13 RCYT H5'	13 RCYT H6	3.828
13 RCYT H5'	13 RCYT H5"	2.376
13 RCYT H5"	13 RCYT H6	3.883
14 RCYT H2'	14 RCYT H6	3.102
14 RCYT H2'	14 RCYT H5	4.994
14 RCYT H3'	14 RCYT H6	2.893
14 RCYT H3'	14 RCYT H5	5.016
14 RCYT H3'	14 RCYT H2'	2.299
14 RCYT H5	14 RCYT H6	2.97
